# Supplementary material for: The Soybean GmNAC019 Transcription Factor Mediates Drought Tolerance in Arabidopsis in an Abscisic Acid-Dependent Manner
Source: PubMed Central journal article supplement (PMC6981368; doi:10.3390/ijms21010286), 2019-12-31
Supplement: ijms-21-00286-s001.pdf [file ijms-21-00286-s001.pdf]

## Supplementary Table

**Table S1.** Genes and primers used for RT-qPCR analysis.

| No. | Gene            | ID              | Forward Primer (5'-3') | Reverse Primer (5'-3') | References | E*  |
|-----|-----------------|-----------------|------------------------|------------------------|------------|-----|
| 1   | <i>CSD1</i>     | At1g08830       | AGACCCTGATGACCTCGGAAA  | GCCACACACCAGAAGATACAC  | [1]        | 1.8 |
| 2   | <i>CAT2</i>     | At4g35090       | AACTCCGCCTGCTGTCTG     | ATAGGGCATCAATCCATC     | [2]        | 1.9 |
| 3   | <i>ACTIN2</i>   | At3g18780       | GCACCACCTGAAAGGAAGTACA | CGATTCCTGGACCTGCCTCATC | [3]        | 1.9 |
| 4   | <i>GmNAC019</i> | Glyma04g38990.1 | CGAACGTGTTCAATGTGTCTCT | CCACTCACGCTGGCATT      | [4]        | 1.8 |

\*As calculated by LinRegPCR software.

## References

1. Chen, Y.; Jiang, J.; Song, A.; Chen, S.; Shan, H.; Luo, H.; Gu, C.; Sun, J.; Zhu, L.; Fang, W.; et al. Ambient temperature enhanced freezing tolerance of *Chrysanthemum dichrum* *CdlCE1* *Arabidopsis* via miR398. *BMC Biol.* **2013**, *11*, 121.
2. Du, Y.Y.; Wang, P.-C.; Chen, J.; Song, C.-P. Comprehensive functional analysis of the catalase gene family in *Arabidopsis thaliana*. *J. Integr. Plant Biol.* **2008**, *50*, 1318–1326.
3. Yang, L.; Liu, Q.; Liu, Z.; Yang, H.; Wang, J.; Li, X.; Yang, Y. *Arabidopsis* C3HC4–ring finger E3 ubiquitin ligase AtAIRP4 positively regulates stress-responsive abscisic acid signaling. *J. Integr. Plant Biol.* **2016**, *58*, 67–80.
4. Thu, N.B.A.; Hoang, X.L.T.; Doan, H.; Nguyen, T.-H.; Bui, D.; Thao, N.P.; Tran, L.-S.P. Differential expression analysis of a subset of *GmNAC* genes in shoots of two contrasting drought-responsive soybean cultivars DT51 and MTD720 under normal and drought conditions. *Mol. Biol. Rep.* **2014**, *41*, 5563–5569.
